# Supplementary material for: Accuracy and reproducibility of virtual cutting guides and 3D-navigation for osteotomies of the mandible and maxilla
Source: PLoS One. 2017 Mar 1;12(3):e0173111. doi: 10.1371/journal.pone.0173111 (PMC5332100; doi:10.1371/journal.pone.0173111)
Supplement: S1 Supporting Information — (XLSX) [file pone.0173111.s001.xlsx]

## Sheet: Mandible-Distance
Units: mm		Unguided						Guided
		Bone1	Bone2	Bone3	Bone4	Bone5	Bone6	Bone1	Bone2	Bone3	Bone4	Bone5	Bone6
Fellow #1	Cut1Marg	3.29044	2.45704	4.49001	2.92392	4.62678	6.38321	2.01905	1.47423	0.699875	0.330542	1.16315	0.210565
	Cut2Marg	0.560848	6.84315	5.04286	13.1303	9.57975	4.29139	0.837685	1.75895	0.264721	0.276037	0.329349	0.490524
	Cut4Ant	2.62066	2.34917	4.70864	6.2916	7.05619	4.00227	1.41803	0.66607	0.631215	0.48552	0.20628	0.473452
	Cut5Ant	1.84487	2.1057	3.93406	2.22253	4.51536	1.08379	2.91914	2.72372	1.87104	2.45236	2.07628	0.9215
	Cut6Post	2.63091	3.5404	2.62127	0.41222	6.35664	1.21683	2.04895	1.24519	2.75554	1.73693	1.35057	1.24686
	Cut7Post	1.86661	0.759716	1.22593	2.61422	0.576032	3.0891	1.61442	1.79043	2.72566	2.08993	1.3427	1.59075
Fellow #2	Cut1Marg	2.07879	2.34259	1.38107	1.96934	3.18699	3.80871	1.12855	0.611285	1.51714	1.62178	1.52964	0.42753
	Cut2Marg	5.15172	8.3243	7.75025	8.36357	10.4848	8.59031	0.327406	0.952773	0.89934	2.26169	0.142445	0.288164
	Cut4Ant	1.79455	3.74937	1.06091	2.62528	4.50076	0.950252	1.20851	0.779595	2.72729	3.97739	0.698487	0.186345
	Cut5Ant	5.82795	5.15209	4.4622	3.6882	4.61443	5.64587	1.24826	1.45266	1.54811	2.37175	1.68125	1.54817
	Cut6Post	5.6608	2.53559	1.26349	3.42319	0.99785	1.03074	1.61929	1.55155	0.311456	2.35535	3.00582	1.57722
	Cut7Post	1.26383	5.65583	1.50656	2.42686	2.1335	2.24027	1.27205	2.68129	0.662788	2.22491	2.90032	0.862397
Staff #1	Cut1Marg	0.494212	0.794784	1.06999	1.06999	1.06999	1.64577	0.723432	1.10086	1.09162	0.442316	0.371721	1.56752
	Cut2Marg	0.66182	2.57785	1.47928	1.0024	3.82987	2.73609	0.448122	1.2774	0.430841	0.879471	1.78819	0.16991
	Cut4Ant	4.79407	0.531943	1.10733	2.18426	3.41826	2.04245	1.31954	1.48152	0.713563	0.793549	2.50314	0.674883
	Cut5Ant	0.68743	1.68762	1.29776	0.981859	1.375	3.83748	0.881421	0.541733	2.27217	1.85224	1.29048	1.69954
	Cut6Post	1.14273	2.73622	0.922511	0.631438	1.19181	0.75381	0.886927	0.448165	1.58137	2.87177	0.693941	2.00264
	Cut7Post	2.12201	3.00366	0.260856	0.534579	2.29145	0.447826	0.896117	0.602092	1.64538	0.369356	0.933028	0.458254
Staff #2	Cut1Marg	3.82294	3.12062	2.89868	1.87852	1.28826	1.76956	1.16336	1.09697	1.55383	0.86667	0.826677	3.0605
	Cut2Marg	2.8394	1.45218	1.90317	0.671218	0.977453	1.91879	1.09268	0.639504	0.341707	1.65866	1.18057	1.14504
	Cut4Ant	0.959862	2.43065	2.06483	0.779252	0.239307	0.509341	0.608877	1.00019	1.05756	1.74278	1.01754	3.28141
	Cut5Ant	0.391398	1.99832	1.66445	1.59901	1.32592	0.449885	2.30818	0.817662	0.588558	0.355836	1.5836	1.74882
	Cut6Post	1.02755	0.609353	0.464438	0.669289	0.342501	0.300096	2.07885	1.23561	0.390321	0.362481	1.33438	0.818255
	Cut7Post	1.43417	1.22943	2.36746	2.80123	1.05323	0.529558	1.06187	0.574865	2.4639	0.478889	0.225593	2.62898
	Median	2.05364						1.16326
	IQR	2.51836						1.07146
	Q1	1.05899						0.637432
	Q3	3.57735						1.70889
	0.95	7.02424						2.7513
	p (ranksum)	3.2201e-09

## Sheet: Mandible-Pitch
Units: Deg		Unguided						Guided
		Bone1	Bone2	Bone3	Bone4	Bone5	Bone6	Bone1	Bone2	Bone3	Bone4	Bone5	Bone6
Fellow #1	Cut1Marg	6.85055	1.63699	8.3522	4.33863	1.32371	4.82902	8.38453	4.3145	4.32591	2.67298	0.035402	1.80073
	Cut2Marg	1.91597	6.89371	4.21965	4.00335	9.6435	2.3233	1.66345	2.00508	3.27101	0.422213	4.74921	7.57602
	Cut4Ant	2.1231	1.73215	0.353326	0.699888	2.20031	4.87717	3.41228	5.87935	5.86685	1.84925	1.85203	3.21749
	Cut5Ant	6.99332	0.491553	2.89891	0.593939	9.08188	4.72195	0.545318	4.04607	3.48714	5.93673	8.39139	4.82726
	Cut6Post	6.03241	2.31017	5.27512	1.79558	1.51733	2.98604	0.884438	7.36363	2.93393	5.20405	2.69805	4.04286
	Cut7Post	3.88423	1.43307	1.18357	1.26185	5.18789	2.72654	1.79511	1.14931	10.5094	1.80664	2.29799	6.94638
Fellow #2	Cut1Marg	1.08276	0.662314	4.10299	0.181184	3.35184	1.997	3.27952	3.80684	2.60932	3.50815	4.6525	3.20864
	Cut2Marg	22.6309	9.92503	11.7294	7.24803	3.16413	16.8081	2.26938	3.6571	1.39909	0.186952	1.76438	0.634366
	Cut4Ant	9.87971	6.40379	2.79904	7.09235	0.467627	3.91666	14.7732	9.84626	0.860327	0.215972	7.29999	0.638468
	Cut5Ant	14.0326	16.0688	12.2851	10.0595	10.7214	11.536	5.80457	3.95813	3.18925	5.79193	3.69424	2.74766
	Cut6Post	12.0755	9.99428	6.8329	16.8536	10.6477	2.98128	3.64226	6.92737	2.9114	0.917997	1.26569	4.04617
	Cut7Post	4.3028	4.4439	9.31789	7.75858	13.3722	14.839	7.55895	0.0672297	4.71481	1.56715	0.428563	3.79293
Staff #1	Cut1Marg	2.75998	0.321898	4.46832	4.46832	4.46832	6.17666	3.4394	5.12189	4.94986	3.28756	1.81945	4.88967
	Cut2Marg	7.06704	0.541202	0.518724	12.2178	3.00516	8.53471	4.76007	13.0188	5.43128	1.8739	5.41247	1.13268
	Cut4Ant	3.18895	3.46924	6.11658	4.68365	3.62439	4.05983	6.84553	7.87153	8.01228	4.07384	3.32982	6.80815
	Cut5Ant	2.49164	2.82495	9.77268	1.55132	2.53926	5.8012	5.69681	4.88835	3.88363	4.30349	6.51021	7.32361
	Cut6Post	4.73578	3.86327	3.22452	3.73639	0.953145	0.517033	2.34594	0.609197	3.01511	2.01093	0.432408	7.06453
	Cut7Post	2.53302	3.21166	0.968079	4.57519	1.74615	4.78782	11.0322	3.80746	6.72447	4.61839	4.29787	4.20634
Staff #2	Cut1Marg	16.2249	13.9163	14.7356	9.36935	7.46728	6.303	6.98278	6.14617	6.83562	3.38684	5.72704	11.9935
	Cut2Marg	3.00965	1.73717	0.677705	3.39579	1.53097	7.07013	8.54269	8.73812	3.51316	3.61157	1.19468	6.92761
	Cut4Ant	3.89295	0.580044	3.64621	3.94851	3.44202	2.60718	7.0855	4.16692	4.67602	1.82916	4.57455	2.73605
	Cut5Ant	3.63132	2.11449	0.148777	4.99709	1.48042	2.65333	2.02859	2.06907	1.6668	0.7222	0.861173	7.55531
	Cut6Post	4.50573	4.53229	6.93943	4.92738	0.216294	0.936227	3.2795	0.933211	3.24799	2.44101	5.00461	3.61571
	Cut7Post	0.304095	3.92862	2.7393	2.23847	6.76577	2.45484	3.90632	0.986562	3.64499	3.00123	2.15237	5.34284
	Median	3.90481						3.65105
	IQR	4.7842						3.6949
	Q1	2.12095						2.00947
	Q3	6.90514						5.70437
	0.95	14.0151						8.51999
	p (ranksum)	0.3595

## Sheet: Mandible-Roll
Units: Deg		Unguided						Guided
		Bone1	Bone2	Bone3	Bone4	Bone5	Bone6	Bone1	Bone2	Bone3	Bone4	Bone5	Bone6
Fellow #1	Cut1Marg	7.52244	5.75544	7.93829	11.2252	7.11197	7.17694	5.8211	1.13632	6.23961	1.05373	4.54441	0.822606
	Cut2Marg	0.568953	4.17117	3.0807	0.439313	1.43303	0.242056	7.8522	1.25372	3.27082	1.02713	0.227222	2.77152
	Cut4Ant	12.5309	0.590402	6.73062	5.62286	6.4437	0.0244868	1.53395	1.8441	0.569401	0.435153	2.0601	2.65717
	Cut5Ant	31.0773	28.8009	25.133	25.3643	26.441	17.0026	1.25021	7.71849	1.03185	1.59759	0.495759	0.674326
	Cut6Post	7.86404	5.6344	3.22967	6.65405	1.95213	0.509878	5.39346	3.56491	9.97253	1.18478	2.01641	7.99233
	Cut7Post	4.80849	11.8384	6.00802	7.85738	4.66644	6.06773	1.28655	2.32681	10.5374	5.94093	0.661055	2.26836
Fellow #2	Cut1Marg	6.96132	11.564	10.0786	12.3282	11.7034	6.92545	1.13848	2.5943	3.95284	4.97519	0.0710339	5.26668
	Cut2Marg	7.59732	13.6426	11.494	13.188	12.337	9.19533	1.5199	8.44955	0.0743883	0.0589732	2.25747	1.83677
	Cut4Ant	14.7764	13.2315	10.387	10.2444	10.521	3.39734	6.87526	10.8524	2.38942	0.94187	2.79437	1.62504
	Cut5Ant	43.7857	37.918	42.0071	33.2903	27.4018	30.3335	8.09605	13.0128	1.8295	1.31271	0.40807	2.14181
	Cut6Post	5.72041	6.48076	1.9072	10.6679	7.30295	10.2899	1.89525	11.6724	1.23054	0.1558	0.308882	1.63063
	Cut7Post	10.0611	18.9012	15.8666	18.4902	12.3134	13.4868	8.51682	8.60996	4.8695	0.0988982	3.1231	2.65907
Staff #1	Cut1Marg	6.14034	2.84297	8.64929	8.64929	8.64929	11.1582	3.94663	2.99364	6.66887	5.38154	3.42602	0.250272
	Cut2Marg	7.61839	6.39882	10.3049	5.21159	3.76838	16.7773	8.21896	2.3548	1.59348	5.14938	2.01435	1.30332
	Cut4Ant	5.91578	7.36484	10.4535	6.71167	7.94227	9.96876	7.36567	2.60808	2.23021	2.9856	5.97375	2.15978
	Cut5Ant	1.72149	22.3766	10.4473	7.82924	18.5571	11.157	3.08523	5.00713	2.98523	2.80218	1.55035	0.0154606
	Cut6Post	8.89385	6.80641	6.12962	6.08901	0.628931	7.12416	0.602474	6.34659	3.13664	6.63217	2.90859	6.91812
	Cut7Post	0.820903	7.48728	2.36692	2.03108	14.2711	0.585969	2.56139	6.1407	0.0351844	2.66279	2.44757	0.906445
Staff #2	Cut1Marg	6.92601	2.99139	4.79823	5.89491	2.25689	0.676119	5.70724	7.69799	3.61413	10.5549	7.2613	0.113724
	Cut2Marg	4.5982	7.55567	8.59291	3.01597	1.94726	4.44992	5.51734	2.56983	1.93322	1.78598	0.890577	7.83419
	Cut4Ant	8.04234	0.502953	5.82936	10.2198	1.12919	2.22138	3.43409	3.45426	3.05222	4.09414	2.28542	0.00126615
	Cut5Ant	0.213046	26.7291	20.3197	20.8442	16.9755	0.0416239	0.727711	1.40545	0.710201	3.8998	2.14484	13.2599
	Cut6Post	0.551297	4.73854	1.83078	4.79562	4.36809	3.75825	0.23632	1.53601	4.04198	3.77116	0.482707	5.32553
	Cut7Post	5.5769	7.86305	4.70185	12.1742	8.01878	3.72274	3.22299	2.43904	3.49639	1.87633	1.73652	16.0515
	Median	7.3339						2.56561
	IQR	7.08202						3.90037
	Q1	4.42946						1.27834
	Q3	11.5115						5.17871
	0.95	27.3009						9.76815
	p (ranksum)	3.7545e-15

## Sheet: Maxilla-Distance
Units: mm		Unguided		Guided
		Bone1	Bone2	Bone1	Bone2
Fellow #1	Cut1	0.972782	1.57068	1.01586	1.77307
	Cut2	0.975958	3.31566	1.70236	1.75922
	Cut3	0.616023	2.28049	1.63182	1.2897
	Cut4	0.879172	2.34505	0.886616	0.304614
	Cut5	2.77113	0.427485	2.09713	0.261531
	Cut6	3.74408	3.64811	1.91081	3.05604
	Cut7	1.5844	2.04281	1.21027	0.921283
	Cut8	2.19509	1.03698	1.29075	2.88451
	Cut9	5.40253	3.70648	1.04385	1.50924
	Cut10	1.38994	1.77385	1.14146	1.09428
Fellow #2	Cut1	0.607269	1.38985	0.727155	0.660944
	Cut2	7.0009	1.79507	0.606912	3.24867
	Cut3	3.21844	2.02496	0.432354	0.464541
	Cut4	3.81869	4.0591	2.84322	3.25525
	Cut5	6.91608	6.97016	0.849222	0.623913
	Cut6	0.796981	1.1527	0.943387	0.925417
	Cut7	11.1306	7.82541	6.62914	2.80475
	Cut8	6.82863	2.22236	1.38889	2.69408
	Cut9	3.08915	3.96349	0.323765	2.68839
	Cut10	6.45585	7.84314	0.659292	0.897221
Staff #1	Cut1	1.10039	1.30497	1.58744	0.400004
	Cut2	2.10048	0.56704	0.53899	0.738638
	Cut3	2.04787	1.31585	1.19281	1.92714
	Cut4	1.5252	1.106	1.35624	0.680202
	Cut5	0.973539	0.859817	0.348558	1.29068
	Cut6	5.268	5.82504	1.52892	4.24831
	Cut7	0.57065	1.35561	1.48047	3.53216
	Cut8	4.21416	3.4814	2.60644	3.27847
	Cut9	1.64463	2.01751	0.228926	1.19659
	Cut10	5.3273	3.57502	0.972332	0.650994
Staff #2	Cut1	0.95965	0.93818	1.06286	0.347551
	Cut2	2.39768	0.909341	1.3459	1.00875
	Cut3	0.721502	1.89693	0.908591	0.744539
	Cut4	1.22875	0.83262	3.11678	2.309
	Cut5	4.08677	2.24877	2.17825	2.23774
	Cut6	3.43717	3.36975	1.17454	3.79583
	Cut7	9.0583	1.75837	5.54771	3.77472
	Cut8	1.36868	4.03866	1.41595	1.54226
	Cut9	2.14688	1.71374	0.778597	1.03096
	Cut10	1.76307	4.30963	1.3801	1.69875
	Median	2.04534		1.29019
	IQR	2.51452		1.32378
	Q1	1.20974		0.831566
	Q3	3.76273		2.11741
	0.95	7.04212		3.77578
	p (ranksum)	5.07e-05

## Sheet: Maxilla-Pitch
Units: Deg		Unguided		Guided
		Bone1	Bone2	Bone1	Bone2
Fellow #1	Cut1	1.0533	11.5869	3.39813	2.31387
	Cut2	2.16456	6.72679	1.41453	7.36233
	Cut3	6.03187	1.65413	7.45216	6.59351
	Cut4	2.71307	1.26582	0.66934	0.184456
	Cut5	2.40442	0.864475	0.933659	1.87401
	Cut6	7.51972	6.93242	3.42897	1.31606
	Cut7	6.95496	14.855	1.96148	6.46682
	Cut8	10.0406	17.836	2.79788	4.27552
	Cut9	2.25059	0.699285	1.65265	6.85567
	Cut10	3.07341	16.9384	1.77058	4.45305
Fellow #2	Cut1	15.7237	18.0727	8.24525	12.4555
	Cut2	29.0746	10.0723	4.04871	0.471819
	Cut3	19.4946	16.0652	0.923204	1.93872
	Cut4	3.78028	1.10206	2.9541	13.5249
	Cut5	30.8703	10.167	0.086374	0.851339
	Cut6	5.37669	3.61859	8.23074	2.25349
	Cut7	3.14057	2.98143	0.254371	2.03263
	Cut8	37.4362	1.9501	2.19786	5.48089
	Cut9	0.200267	9.48708	9.21502	10.3159
	Cut10	4.70566	25.3293	4.1767	2.68795
Staff #1	Cut1	2.22109	10.8953	7.84276	5.20786
	Cut2	7.94262	7.43847	0.14926	1.73868
	Cut3	6.42357	15.7001	3.57843	6.07215
	Cut4	5.83646	4.43399	3.0192	0.720311
	Cut5	24.8426	6.07589	1.21182	1.06226
	Cut6	20.4224	7.39402	7.35915	2.69583
	Cut7	6.57857	2.26568	13.3228	4.58009
	Cut8	8.62939	9.41798	6.60092	7.23724
	Cut9	3.54135	0.103953	0.548544	0.209589
	Cut10	2.62303	0.174361	0.854242	4.67599
Staff #2	Cut1	18.9466	3.42108	1.19785	0.855625
	Cut2	9.63076	11.8389	2.3287	9.67088
	Cut3	12.3309	10.091	4.73341	8.11511
	Cut4	17.9751	9.76754	1.03089	1.87279
	Cut5	13.187	16.6805	3.96248	1.54971
	Cut6	12.8238	17.3322	13.0053	6.7358
	Cut7	2.01309	2.8425	2.4318	0.133118
	Cut8	5.47791	11.5825	3.31445	0.340373
	Cut9	7.68061	2.61256	0.639972	6.84049
	Cut10	6.20664	0.597727	3.22075	7.25999
	Median	6.94369		2.87599
	IQR	9.66542		5.39238
	Q1	2.81015		1.20833
	Q3	12.4542		6.59536
	0.95	24.8669		10.4229
	p (ranksum)	3.49e-06

## Sheet: Maxilla-Roll
Units: Deg		Unguided		Guided
		Bone1	Bone2	Bone1	Bone2
Fellow #1	Cut1	2.05058	6.77753	1.38855	5.6952
	Cut2	7.19791	1.49732	4.83034	1.17955
	Cut3	0.112577	0.326183	0.561865	6.00433
	Cut4	5.8992	3.54127	2.8433	1.29609
	Cut5	10.013	0.0490198	4.49878	4.14519
	Cut6	17.9105	11.7864	4.838	5.57711
	Cut7	6.12378	6.24881	9.47382	8.03613
	Cut8	8.40571	2.81681	0.0302638	3.36099
	Cut9	20.774	10.0239	1.62842	0.151807
	Cut10	12.5868	11.6505	8.01245	3.95462
Fellow #2	Cut1	1.10225	0.369028	4.84367	1.09443
	Cut2	40.0615	15.9806	3.60624	0.0272056
	Cut3	13.7931	6.24642	2.35303	2.58512
	Cut4	25.656	26.5411	2.38163	5.28077
	Cut5	16.87	9.99513	1.01967	4.62315
	Cut6	2.39111	16.7024	4.00547	2.39153
	Cut7	34.7742	23.2364	10.9224	7.78919
	Cut8	7.40641	5.7902	4.62141	0.335834
	Cut9	19.6058	12.5516	0.758658	3.34634
	Cut10	10.9162	13.2016	1.33843e-05	4.13824
Staff #1	Cut1	2.62698	3.89693	0.783963	0.0105829
	Cut2	4.71189	0.98747	2.02573	1.08868
	Cut3	9.66041	6.44012	3.03819	0.840566
	Cut4	5.25181	4.12417	0.784873	1.25056
	Cut5	4.39687	14.306	4.65718	1.69927
	Cut6	6.94967	1.50159	6.45418	6.29456
	Cut7	12.3682	15.1479	1.42744	7.95247
	Cut8	8.14396	10.9456	3.96	2.0603
	Cut9	2.88037	0.969422	0.437496	2.49645
	Cut10	3.28261	8.93445	4.76248	0.806413
Staff #2	Cut1	1.47183	0.373197	3.7232	1.54189
	Cut2	4.93093	1.49208	0.828241	1.56672
	Cut3	2.31552	11.9843	1.83316	0.937748
	Cut4	12.1834	5.86547	6.67567	0.151236
	Cut5	19.7406	2.22962	4.03479	4.92727
	Cut6	22.3943	22.7142	9.74416	11.8454
	Cut7	29.3242	25.271	9.46929	1.02578
	Cut8	10.5282	3.05192	5.91913	9.67138
	Cut9	2.99795	11.9006	4.94648	4.39721
	Cut10	25.945	20.2359	0.699074	0.19636
	Median	7.77519		2.94074
	IQR	10.8823		3.7836
	Q1	3.03842		1.07296
	Q3	13.9213		4.86457
	0.95	25.9748		9.48369
	p (ranksum)	1.81e-08

## Sheet: TrackerRegistration
Fiducial Registration Error (mm) - From each guided session
	Mandible								Maxilla
	Bone1	Bone2	Bone3	Bone4	Bone5	Bone6			Bone1	Bone2
Fellow #1	1.35921	2.08325	1.41625	1.41321	1.817	1.21916		Fellow #1	0.9292	1.3702
Fellow #2	1.30997	2.06422	1.71387	2.57522	1.58004	2.17434		Fellow #2	1.9628	1.1989
Staff #1	1.82218	2.34306	1.36351	1.49767	1.51383	1.45237		Staff #1	1.18	1.3962
Staff #2	1.61029	1.61029	1.37482	1.20748	1.47001	1.84399		Staff #2	1.2997	0.9497
Median	1.54694							Median	1.2493
IQR	0.424021							IQR	0.254275
Registrations	24							Registrations	8
Fiducials	4							Fiducials	6
Combined (Mandible + Maxilla)
	Mandible						Maxilla
	Bone1	Bone2	Bone3	Bone4	Bone5	Bone6	Bone1	Bone2
Fellow #1	1.35921	2.08325	1.41625	1.41321	1.817	1.21916	0.9292	1.3702
Fellow #2	1.30997	2.06422	1.71387	2.57522	1.58004	2.17434	1.9628	1.1989
Staff #1	1.82218	2.34306	1.36351	1.49767	1.51383	1.45237	1.18	1.3962
Staff #2	1.61029	1.61029	1.37482	1.20748	1.47001	1.84399	1.2997	0.9497
Median	1.46119
IQR	0.471397
Registrations	32

## Sheet: ImageRegistration
Fiducial Registration Error (mm) - Image-to-Image Registration
		Mandible									Maxilla
		Bone1	Bone2	Bone3	Bone4	Bone5	Bone6				Bone1	Bone2
Unguided	Fellow #1	1.8147	2.23209	2.05105	1.49854	1.60049	1.30915		Unguided	Fellow #1	0.584535	0.98508
	Fellow #2	1.71151	1.63346	1.60847	1.43991	1.43627	1.75963			Fellow #2	0.922504	0.667091
	Staff #1	0.911723	2.40085	1.0411	1.25569	0.704812	1.67961			Staff #1	0.712872	0.638776
	Staff #2	2.19603	1.79985	1.97758	1.75259	1.83525	1.51108			Staff #2	1.23521	0.516529
Guided	Fellow #1	1.26855	1.61486	1.51999	2.06005	1.5345	1.02684		Guided	Fellow #1	0.377133	0.746797
	Fellow #2	1.71614	1.77969	1.19129	1.38772	1.24226	1.41351			Fellow #2	0.728116	1.14988
	Staff #1	1.09723	0.89837	1.36765	1.93918	0.827541	0.789313			Staff #1	0.964439	0.900618
	Staff #2	2.14433	1.94115	1.02979	1.87687	1.94731	1.70237			Staff #2	0.930964	1.31614
	Median	1.60448								Median	0.823707
	IQR	0.554502								IQR	0.309587
	Q1	1.26534								Q1	0.660012
	Q3	1.81984								Q3	0.969599
	Registrations	48								Registrations	16
Combined (Mandible + Maxilla)
		Mandible						Maxilla
		Bone1	Bone2	Bone3	Bone4	Bone5	Bone6	Bone1	Bone2
Unguided	Fellow #1	1.8147	2.23209	2.05105	1.49854	1.60049	1.30915	0.584535	0.98508
	Fellow #2	1.71151	1.63346	1.60847	1.43991	1.43627	1.75963	0.922504	0.667091
	Staff #1	0.911723	2.40085	1.0411	1.25569	0.704812	1.67961	0.712872	0.638776
	Staff #2	2.19603	1.79985	1.97758	1.75259	1.83525	1.51108	1.23521	0.516529
Guided	Fellow #1	1.26855	1.61486	1.51999	2.06005	1.5345	1.02684	0.377133	0.746797
	Fellow #2	1.71614	1.77969	1.19129	1.38772	1.24226	1.41351	0.728116	1.14988
	Staff #1	1.09723	0.89837	1.36765	1.93918	0.827541	0.789313	0.964439	0.900618
	Staff #2	2.14433	1.94115	1.02979	1.87687	1.94731	1.70237	0.930964	1.31614
	Median	1.40062
	IQR	0.798278
	Q1	0.95607
	Q3	1.75435
	Registrations	64

## Sheet: MaxillaMandible
Overall				Fellow				Staff
	Distance (mm)				Distance (mm)				Distance (mm)
	Unguided	Guided			Unguided	Guided			Unguided	Guided
Median	2.05	1.2		Median	2.85	1.29		Median	1.4	1.1
IQR	2.66	1.08		IQR	3.2	1.28		IQR	1.41	0.992
0.95	7.3	3.15		0.95	8.4	3		0.95	4.3	3.3
Q1	1.1	0.7		Q1	1.7	0.7		Q1	0.9	0.7
Q3	3.7	1.8		Q3	4.9	2		Q3	2.3	1.7
p	8.29e-13			p	7.44e-14			p	0.00589
	Pitch (Deg)				Pitch (Deg)				Pitch (Deg)
	Unguided	Guided			Unguided	Guided			Unguided	Guided
Median	4.47	3.5		Median	4.78	3.21		Median	4.25	3.89
IQR	7.08	4.03		IQR	7.87	3.63		IQR	4.92	4.61
0.95	17.9	9.7		0.95	19.4	9.8		0.95	16.6	9.6
Q1	2.3	1.8		Q1	2.2	1.7		Q1	2.5	1.9
Q3	9.4	5.8		Q3	10.1	5.3		Q3	7.5	6.6
p	0.0002			p	0.000223			p	0.163
	Roll (Deg)				Roll (Deg)				Roll (Deg)
	Unguided	Guided			Unguided	Guided			Unguided	Guided
Median	7.39	2.59		Median	10	2.39		Median	6.13	2.86
IQR	8.56	3.78		IQR	7.98	3.78		IQR	7.38	3.66
0.95	26.9	9.7		0.95	33	9.9		0.95	22.4	9.7
Q1	3.8	1.2		Q1	5.7	1.1		Q1	3	1.4
Q3	12.3	5		Q3	13.7	4.9		Q3	10.4	5.1
p	3.8e-22			p	1.9e-15			p	1.43e-08
				Unguided				Guided
					Distance (mm)				Distance (mm)
					Fellow	Staff			Fellow	Staff
				Median	2.85	1.4		Median	1.29	1.1
				IQR	3.2	1.41		IQR	1.28	0.992
				0.95	8.4	4.3		0.95	3	3.3
				Q1	1.7	0.9		Q1	0.7	0.7
				Q3	4.9	2.3		Q3	2	1.7
				p	1.79e-09			p	0.349
					Pitch (Deg)				Pitch (Deg)
					Fellow	Staff			Fellow	Staff
				Median	4.78	4.25		Median	3.21	3.89
				IQR	7.87	4.92		IQR	3.63	4.61
				0.95	19.4	16.6		0.95	9.8	9.6
				Q1	2.2	2.5		Q1	1.7	1.9
				Q3	10.1	7.5		Q3	5.3	6.6
				p	0.322			p	0.0963
					Roll (Deg)				Roll (Deg)
					Fellow	Staff			Unguided	Guided
				Median	10	6.13		Median	2.39	2.86
				IQR	7.98	7.38		IQR	3.78	3.66
				0.95	33	22.4		0.95	9.9	9.7
				Q1	5.7	3		Q1	1.1	1.4
				Q3	13.7	10.4		Q3	4.9	5.1
				p	0.00178			p	0.523
